# Supplementary material for: Heme oxygenase‐1 induction attenuates senescence in chronic obstructive pulmonary disease lung fibroblasts by protecting against mitochondria dysfunction
Source: PubMed Central journal article supplement (PMC6260925; doi:10.1111/acel.12837), 2018-10-19

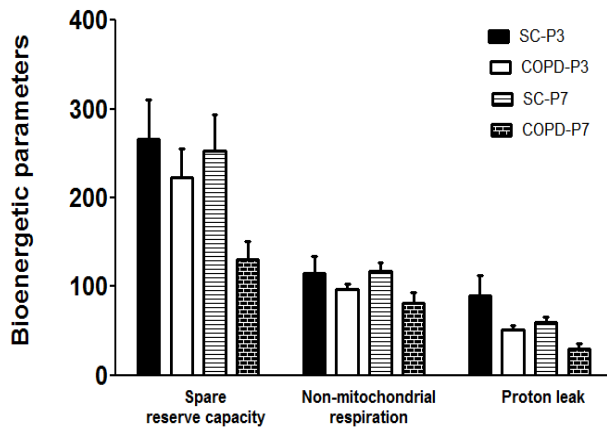

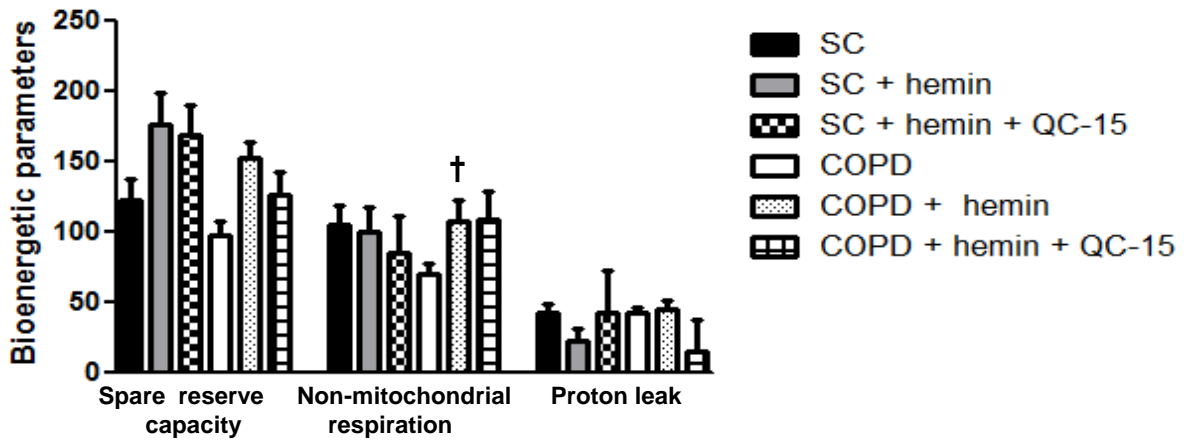

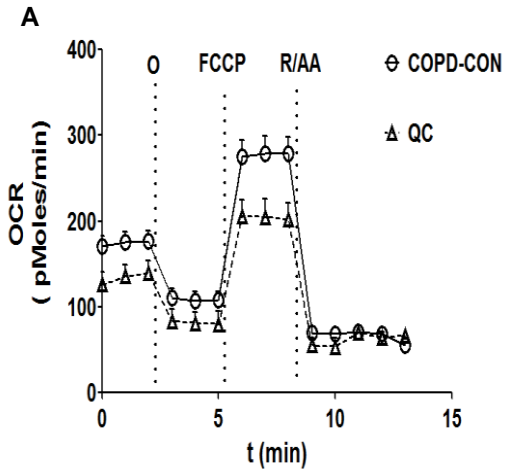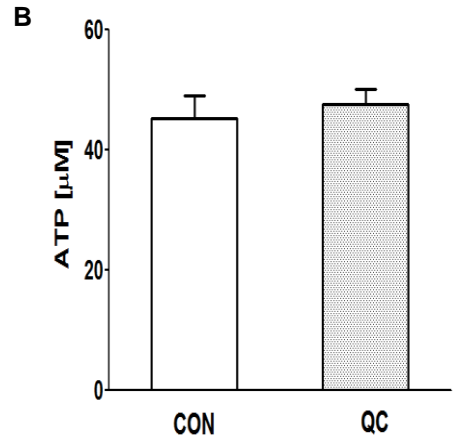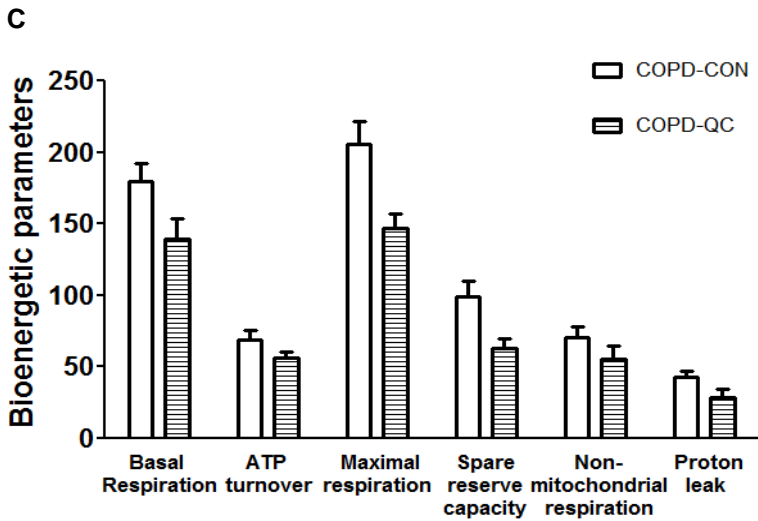

Supplementary-5 (S5)

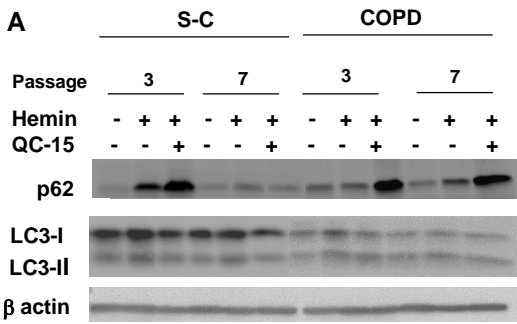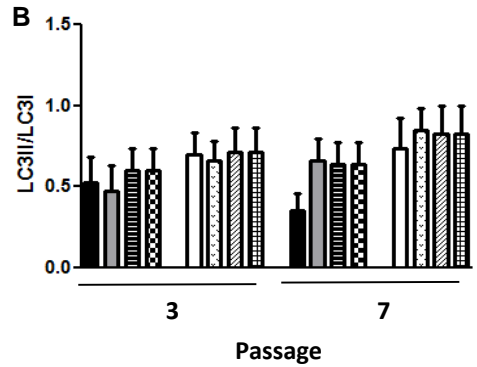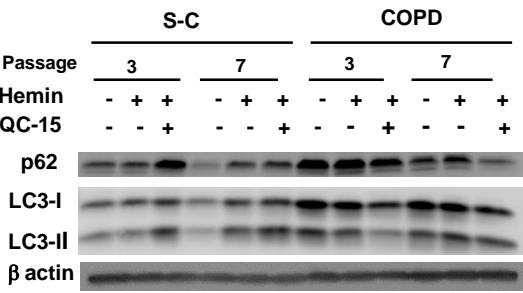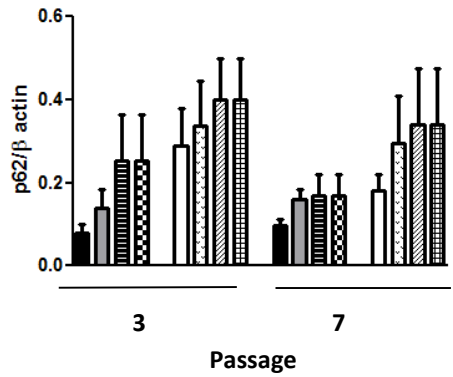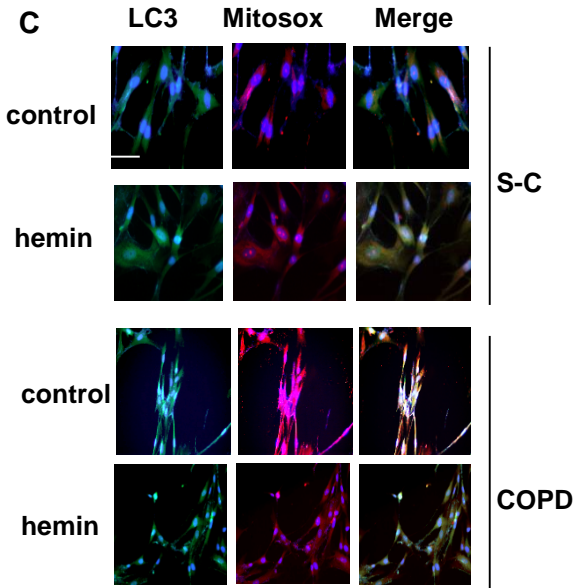

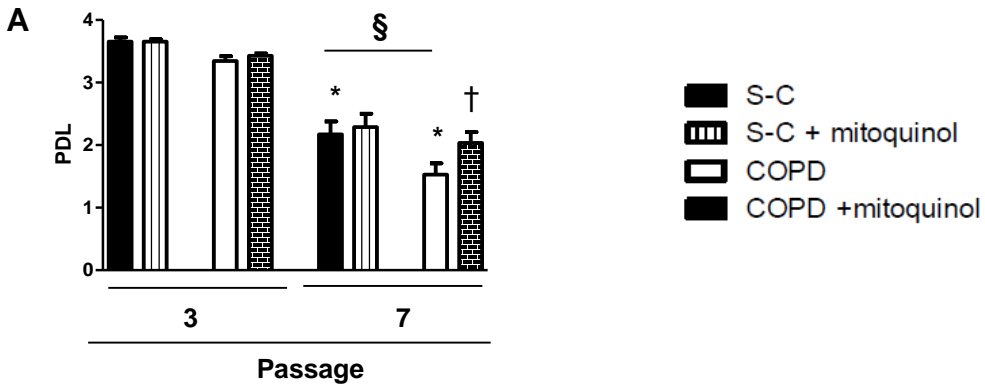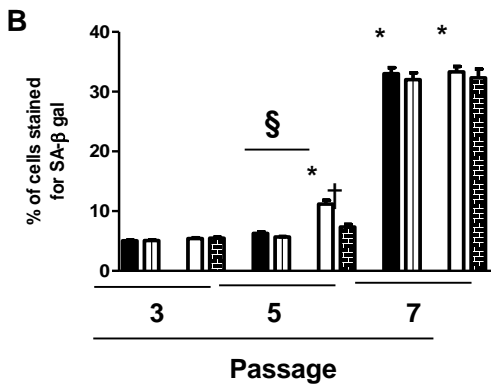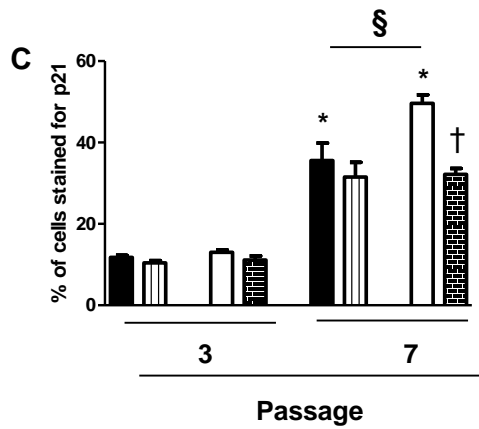

Supplement: ACEL-17-e12837-s001.pdf [file ACEL-17-e12837-s001.pdf]
